# Supplementary material for: Rapid Ragi: A speed breeding protocol for Finger millet
Source: Research Square preprint supplement (doi:10.21203/rs.3.rs-6399595/v1), 2025-04-14
Supplement: Supplementary file 1 [file 367811d3cee7ed0309884568.docx]

**Supplementary tables and figures**

**Table 1** Details of the plant material utilised in the study for standardising planting density

| **Experiment** | **Genotype** | **DF** | **DM** | **Segment** |
| --- | --- | --- | --- | --- |
| **Standardising the plant density** | IE 2030 | 62 | 93 | Early |
| VL 352 | 70 | 101 | Early |
| GPU 28 | 82 | 125 | Medium |
| IE 4121 | 75 | 118 | Medium |
| IE 4497 | 74 | 117 | Medium |
| IE 4816 | 74 | 128 | Long |
| GPU 67 | 85 | 128 | Long |
| IE 2572 | 93 | 132 | Long |
| IE 501 | 80 | 127 | Long |
|  |  |  |  |  |
| **Standardising the nutrient and photoperiod** | IE6717 | 73 | 125 | Medium |
| ML365 | 78 | 124 | Medium |
| GPU 67 | 85 | 128 | Long |
| KMR301 | 83 | 130 | Long |
| IE3476 | 89 | 135 | Long |
|  |  |  |  |  |
| **Optimising the protocol** | IE 96 | 70 | 108 | Early |
| IE 5331 | 86 | 116 | Medium |
| IE 2875 | 86 | 125 | Medium |
| IE 3225 | 94 | 128 | Long |
|  |  |  |  |  |
| **Validation** | VR 708 | 59 | 102 | Early |
| INDAF 9 | 60 | 105 | Early |
| GPU 26 | 77 | 120 | Medium |
| GPU 28 | 82 | 125 | Medium |
| VR 847 | 78 | 119 | Medium |
| PR 1045 | 78 | 125 | Medium |
| VR 936 | 79 | 125 | Medium |
| PR 202 | 84 | 132 | Long |
| GPU 67 | 83 | 128 | Long |
| MR 6 | 85 | 136 | Long |

*Control data obtained from the field experiments at ICRISAT, Patancheru

* DF: Days to flowering; DM: Days to maturity

**Table 2** Performance means of finger millet genotypes for various traits at two different planting densities

| **Treatments** | **50-WELL** | | | | **105-WELL** | | | |
| --- | --- | --- | --- | --- | --- | --- | --- | --- |
| **Genotype** | **PG** | **DF** | **DM** | **PH** | **PG** | **DF** | **DM** | **PH** |
| IE 2030 | 92.5 | 50 | 90 | 105.1 | 84.0 | 50 | 90 | 89.9 |
| VL 352 | 96.0 | 50 | 90 | 109.4 | 96.5 | 50 | 90 | 96.8 |
| GPU 28 | 100.0 | 50 | 90 | 107.1 | 97.5 | 50 | 90 | 89.7 |
| IE 4121 | 84.0 | 50 | 90 | 104.7 | 90.5 | 50 | 90 | 84.9 |
| IE 4497 | 93.5 | 55 | 95 | 108.9 | 89.0 | 50 | 90 | 98.9 |
| IE 4816 | 87.0 | 50 | 90 | 110.2 | 88.0 | 50 | 90 | 87.8 |
| GPU 67 | 87.5 | 50 | 90 | 109.9 | 90.5 | 50 | 90 | 82.5 |
| IE 2572 | 93.0 | 70 | 110 | 110.3 | 93.0 | 65 | 105 | 100.3 |
| IE 501 | 79.0 | 55 | 95 | 112.6 | 75.0 | 60 | 100 | 101.9 |
| **Mean** | 90.28 | 53.33 | 93.33 | 108.67 | 89.33 | 52.78 | 92.78 | 92.48 |
| **SD** | 6.10 | 6.24 | 6.24 | 2.44 | 6.41 | 5.33 | 5.33 | 6.69 |

*PG: Percentage of Germination (%); DF: Days to flowering; DM: Days to maturity; PH: Plant height (cm)

**Table 3** Analysis of variance across the planting densities among finger millet genotypes

| **Source of variation** | **PG** | **DF** | **DM** | **PH** |
| --- | --- | --- | --- | --- |
| **Replications** | 3.361 | 25*** | 25*** | 343.484*** |
| **Treatments** | 83.42*** | 71.405*** | 71.405*** | 192.475*** |
| **Density(A)** | 8.028 | 2.778 | 2.778 | 2358.721*** |
| **Genotypes among densities(B)** | 156.361*** | 142.361*** | 142.361*** | 76.842*** |
| **A X B** | 19.903*** | 9.028*** | 9.028*** | 37.327 |
| **Error** | 18.243 | 7.353 | 7.353 | 63.165 |
| **Total** | - | - | - | - |
| **CV (%)** | 4.75 | 5.11 | 2.91 | 7.9 |

*PG: Percentage of Germination (%); DF: Days to flowering; DM: Days to maturity; PH: Plant height (cm)

**Table 4** Mean performance of genotypes at varying photoperiod and nutrient regime

| **Treatments** | **9 hours** | | **7 hours** | | **5 hours** | |
| --- | --- | --- | --- | --- | --- | --- |
| **Hoagland** | **Basacote + 20:20:20** | **Hoagland** | **Basacote + 20:20:20** | **Hoagland** | **Basacote + 20:20:20** |
| **GPU67** | 58 | 76 | 62 | 86 | 83 | Not flowered |
| **ML365** | 63 | 82 | 66 | 88 | 82 | Not flowered |
| **KMR301** | 65 | Not flowered | 77 | Not flowered | Not flowered | Not flowered |
| **IE3476** | 56 | 70 | 57 | 84 | 77 | Not flowered |
| **IE6717** | 65 | 86 | 66 | 77 | 79 | Not flowered |
| **Mean** | 61 | 78 | 66 | 84 | 80 | - |

**Table 5** Analysis of variance across the nutrition and photoperiods among finger millet genotypes

| **Source of Variation** | **Sum of Squares** | **df** | **F-value** | **p-value** |
| --- | --- | --- | --- | --- |
| **Photoperiod** | 11247.18 | 2 | 182.13 | **<0.0001** |
| **Nutrient** | 168.32 | 1 | 5.45 | *0.0321* |
| **Photoperiod × Nutrient** | 5104.90 | 2 | 82.67 | **<0.0001** |
| **Residual** | 524.90 | 17 | — | — |

**Table 6** Mean values of treatments and their interaction effects upon testing the protocol

|  |  |  |  | **DM** | | **DF** | | **Plht** | | **SPP** | |
| --- | --- | --- | --- | --- | --- | --- | --- | --- | --- | --- | --- |
| **Effect** | **Nutrient** | **Photoperiod** | **Variety** | **Estimate** | **StdErr** | **Estimate** | **StdErr** | **Estimate** | **StdErr** | **Estimate** | **StdErr** |
| Nutrient | HOAGLAND |  |  | 74.10 | 0.17 | 58.88 | 0.22 | 30.56 | 0.67 | 3.86 | 0.09 |
| Nutrient | NPK |  |  | 76.00 | 0.20 | 60.87 | 0.26 | 45.60 | 0.67 | 3.15 | 0.09 |
| Photoperiod |  | 7HOURS |  | 82.10 | 0.26 | 67.53 | 0.34 | 34.30 | 0.82 | 2.99 | 0.11 |
| Photoperiod |  | 8HOURS |  | 71.48 | 0.21 | 57.65 | 0.27 | 38.89 | 0.82 | 3.70 | 0.11 |
| Photoperiod |  | 9HOURS |  | 71.58 | 0.21 | 54.45 | 0.27 | 41.05 | 0.82 | 3.83 | 0.11 |
| Nutrient*Photoperiod | HOAGLAND | 7HOURS |  | 81.60 | 0.30 | 67.65 | 0.39 | 27.78 | 1.16 | 3.22 | 0.16 |
| Nutrient*Photoperiod | HOAGLAND | 8HOURS |  | 72.05 | 0.30 | 56.25 | 0.39 | 30.63 | 1.16 | 4.09 | 0.16 |
| Nutrient*Photoperiod | HOAGLAND | 9HOURS |  | 68.65 | 0.30 | 52.75 | 0.39 | 33.29 | 1.16 | 4.27 | 0.16 |
| Nutrient*Photoperiod | NPK | 7HOURS |  | 82.60 | 0.43 | 67.40 | 0.55 | 40.82 | 1.16 | 2.76 | 0.16 |
| Nutrient*Photoperiod | NPK | 8HOURS |  | 70.90 | 0.30 | 59.05 | 0.39 | 47.15 | 1.16 | 3.31 | 0.16 |
| Nutrient*Photoperiod | NPK | 9HOURS |  | 74.50 | 0.30 | 56.15 | 0.39 | 48.82 | 1.16 | 3.39 | 0.16 |
| Variety |  |  | V1 | 62.93 | 0.25 | 50.77 | 0.32 | 39.99 | 0.95 | 4.54 | 0.13 |
| Variety |  |  | V2 | 90.67 | 0.32 | 75.90 | 0.41 | 41.22 | 0.95 | 2.40 | 0.13 |
| Variety |  |  | V3 | 84.13 | 0.25 | 62.20 | 0.32 | 37.84 | 0.95 | 2.12 | 0.13 |
| Variety |  |  | V4 | 62.47 | 0.25 | 50.63 | 0.32 | 33.26 | 0.95 | 4.97 | 0.13 |
| Nutrient*Variety | HOAGLAND |  | V1 | 62.40 | 0.35 | 50.40 | 0.45 | 33.99 | 1.34 | 4.77 | 0.18 |
| Nutrient*Variety | HOAGLAND |  | V2 | 89.67 | 0.35 | 72.00 | 0.45 | 31.92 | 1.34 | 3.12 | 0.18 |
| Nutrient*Variety | HOAGLAND |  | V3 | 82.27 | 0.35 | 62.73 | 0.45 | 30.61 | 1.34 | 2.44 | 0.18 |
| Nutrient*Variety | HOAGLAND |  | V4 | 62.07 | 0.35 | 50.40 | 0.45 | 25.72 | 1.34 | 5.12 | 0.18 |
| Nutrient*Variety | NPK |  | V1 | 63.47 | 0.35 | 51.13 | 0.45 | 46.00 | 1.34 | 4.31 | 0.18 |
| Nutrient*Variety | NPK |  | V2 | 91.67 | 0.53 | 79.80 | 0.69 | 50.51 | 1.34 | 1.67 | 0.18 |
| Nutrient*Variety | NPK |  | V3 | 86.00 | 0.35 | 61.67 | 0.45 | 45.07 | 1.34 | 1.80 | 0.18 |
| Nutrient*Variety | NPK |  | V4 | 62.87 | 0.35 | 50.87 | 0.45 | 40.80 | 1.34 | 4.82 | 0.18 |
| Photoperiod*Variety |  | 7HOURS | V1 | 70.00 | 0.43 | 57.70 | 0.55 | 34.99 | 1.64 | 3.85 | 0.22 |
| Photoperiod*Variety |  | 7HOURS | V2 | 96.20 | 0.74 | 83.80 | 0.95 | 37.21 | 1.64 | 1.67 | 0.22 |
| Photoperiod*Variety |  | 7HOURS | V3 | 92.00 | 0.43 | 70.70 | 0.55 | 35.76 | 1.64 | 2.15 | 0.22 |
| Photoperiod*Variety |  | 7HOURS | V4 | 70.20 | 0.43 | 57.90 | 0.55 | 29.25 | 1.64 | 4.29 | 0.22 |
| Photoperiod*Variety |  | 8HOURS | V1 | 60.40 | 0.43 | 47.90 | 0.55 | 42.89 | 1.64 | 4.87 | 0.22 |
| Photoperiod*Variety |  | 8HOURS | V2 | 89.60 | 0.43 | 78.40 | 0.55 | 46.56 | 1.64 | 2.91 | 0.22 |
| Photoperiod*Variety |  | 8HOURS | V3 | 76.40 | 0.43 | 57.90 | 0.55 | 36.15 | 1.64 | 1.58 | 0.22 |
| Photoperiod*Variety |  | 8HOURS | V4 | 59.50 | 0.43 | 46.40 | 0.55 | 29.97 | 1.64 | 5.45 | 0.22 |
| Photoperiod*Variety |  | 9HOURS | V1 | 58.40 | 0.43 | 46.70 | 0.55 | 42.11 | 1.64 | 4.91 | 0.22 |
| Photoperiod*Variety |  | 9HOURS | V2 | 86.20 | 0.43 | 65.50 | 0.55 | 39.90 | 1.64 | 2.61 | 0.22 |
| Photoperiod*Variety |  | 9HOURS | V3 | 84.00 | 0.43 | 58.00 | 0.55 | 41.63 | 1.64 | 2.63 | 0.22 |
| Photoperiod*Variety |  | 9HOURS | V4 | 57.70 | 0.43 | 47.60 | 0.55 | 40.58 | 1.64 | 5.19 | 0.22 |
| Nutrie*Photop*Variet | HOAGLAND | 7HOURS | V1 | 70.20 | 0.61 | 57.40 | 0.78 | 33.82 | 2.32 | 4.12 | 0.31 |
| Nutrie*Photop*Variet | HOAGLAND | 7HOURS | V2 | 96.20 | 0.61 | 83.80 | 0.78 | 28.93 | 2.32 | 2.63 | 0.31 |
| Nutrie*Photop*Variet | HOAGLAND | 7HOURS | V3 | 89.80 | 0.61 | 71.00 | 0.78 | 26.29 | 2.32 | 1.74 | 0.31 |
| Nutrie*Photop*Variet | HOAGLAND | 7HOURS | V4 | 70.20 | 0.61 | 58.40 | 0.78 | 22.07 | 2.32 | 4.40 | 0.31 |
| Nutrie*Photop*Variet | HOAGLAND | 8HOURS | V1 | 58.80 | 0.61 | 46.80 | 0.78 | 33.80 | 2.32 | 5.03 | 0.31 |
| Nutrie*Photop*Variet | HOAGLAND | 8HOURS | V2 | 91.40 | 0.61 | 71.40 | 0.78 | 33.37 | 2.32 | 3.54 | 0.31 |
| Nutrie*Photop*Variet | HOAGLAND | 8HOURS | V3 | 79.20 | 0.61 | 60.00 | 0.78 | 30.75 | 2.32 | 2.46 | 0.31 |
| Nutrie*Photop*Variet | HOAGLAND | 8HOURS | V4 | 58.80 | 0.61 | 46.80 | 0.78 | 24.58 | 2.32 | 5.34 | 0.31 |
| Nutrie*Photop*Variet | HOAGLAND | 9HOURS | V1 | 58.20 | 0.61 | 47.00 | 0.78 | 34.35 | 2.32 | 5.15 | 0.31 |
| Nutrie*Photop*Variet | HOAGLAND | 9HOURS | V2 | 81.40 | 0.61 | 60.80 | 0.78 | 33.47 | 2.32 | 3.19 | 0.31 |
| Nutrie*Photop*Variet | HOAGLAND | 9HOURS | V3 | 77.80 | 0.61 | 57.20 | 0.78 | 34.80 | 2.32 | 3.13 | 0.31 |
| Nutrie*Photop*Variet | HOAGLAND | 9HOURS | V4 | 57.20 | 0.61 | 46.00 | 0.78 | 30.52 | 2.32 | 5.63 | 0.31 |
| Nutrie*Photop*Variet | NPK | 7HOURS | V1 | 69.80 | 0.61 | 58.00 | 0.78 | 36.15 | 2.32 | 3.58 | 0.31 |
| Nutrie*Photop*Variet | NPK | 7HOURS | V2 | 96.20 | 1.35 | 83.80 | 1.74 | 45.48 | 2.32 | 0.71 | 0.31 |
| Nutrie*Photop*Variet | NPK | 7HOURS | V3 | 94.20 | 0.61 | 70.40 | 0.78 | 45.22 | 2.32 | 2.57 | 0.31 |
| Nutrie*Photop*Variet | NPK | 7HOURS | V4 | 70.20 | 0.61 | 57.40 | 0.78 | 36.42 | 2.32 | 4.17 | 0.31 |
| Nutrie*Photop*Variet | NPK | 8HOURS | V1 | 62.00 | 0.61 | 49.00 | 0.78 | 51.97 | 2.32 | 4.70 | 0.31 |
| Nutrie*Photop*Variet | NPK | 8HOURS | V2 | 87.80 | 0.61 | 85.40 | 0.78 | 59.74 | 2.32 | 2.28 | 0.31 |
| Nutrie*Photop*Variet | NPK | 8HOURS | V3 | 73.60 | 0.61 | 55.80 | 0.78 | 41.55 | 2.32 | 0.71 | 0.31 |
| Nutrie*Photop*Variet | NPK | 8HOURS | V4 | 60.20 | 0.61 | 46.00 | 0.78 | 35.35 | 2.32 | 5.55 | 0.31 |
| Nutrie*Photop*Variet | NPK | 9HOURS | V1 | 58.60 | 0.61 | 46.40 | 0.78 | 49.87 | 2.32 | 4.67 | 0.31 |
| Nutrie*Photop*Variet | NPK | 9HOURS | V2 | 91.00 | 0.61 | 70.20 | 0.78 | 46.32 | 2.32 | 2.03 | 0.31 |
| Nutrie*Photop*Variet | NPK | 9HOURS | V3 | 90.20 | 0.61 | 58.80 | 0.78 | 48.45 | 2.32 | 2.13 | 0.31 |
| Nutrie*Photop*Variet | NPK | 9HOURS | V4 | 58.20 | 0.61 | 49.20 | 0.78 | 50.63 | 2.32 | 4.75 | 0.31 |

*DF: Days to fifty percent flowering; DM: Days to maturity; PH: Plant height (cm); SPP: Seeds per panicle.

**Table 7** Analysis of variance among the parameters in testing the combined protocol

|  |  | **DM** | | **DF** | | **PH** | | **SPP** | |
| --- | --- | --- | --- | --- | --- | --- | --- | --- | --- |
| **Effect** | **ndf** | **F-Statistic** | **ProbF** | **F-Statistic** | **ProbF** | **F-Statistic** | **ProbF** | **F-Statistic** | **ProbF** |
| Nutrient | 1 | 50.71 | <.0001 | 33.52 | <.0001 | 252.67 | <.0001 | 30.79 | <.0001 |
| Photoperiod | 2 | 611.01 | <.0001 | 470.33 | <.0001 | 17.73 | <.0001 | 16.75 | <.0001 |
| Nutrient*Photoperiod | 2 | 69.41 | <.0001 | 9.60 | 0.0002 | 1.20 | 0.3048 | 0.94 | 0.3959 |
| Variety | 3 | 2858.06 | <.0001 | 1048.73 | <.0001 | 13.71 | <.0001 | 129.41 | <.0001 |
| Nutrient*Variety | 3 | 7.20 | 0.0002 | 26.48 | <.0001 | 2.06 | 0.1103 | 3.94 | 0.0107 |
| Photoperiod*Variety | 6 | 37.43 | <.0001 | 36.61 | <.0001 | 5.66 | <.0001 | 4.08 | 0.0011 |
| Nutrie*Photop*Variet | 6 | 36.40 | <.0001 | 10.01 | <.0001 | 4.57 | 0.0004 | 3.47 | 0.0038 |
|  |  | **DM** | | **DF** | | **PH** | | **SPP** | |
| **Covparm** |  | **Variance component** | **StdErr** | **Variance component** | **StdErr** | **Variance component** | **StdErr** | **Variance component** | **StdErr** |
| Residual |  | 1.83 | 0.27 | 3.02 | 0.45 | 26.83 | 3.87 | 0.49 | 0.07 |
|  |  |  |  |  |  |  |  |  |  |
|  |  | **DM** | | **DF** | | **PH** | | **SPP** | |
| **CV%** |  | 1.80 |  | 2.90 |  | 13.60 |  | 20.00 |  |

*DF: Days to fifty percent flowering; DM: Days to maturity; PH: Plant height (cm); SPP: Seeds per panicle

**Table 8** Mean values of finger millet genotypes upon validation of the protocol

| **7 HOURS** | | | | | | | | |
| --- | --- | --- | --- | --- | --- | --- | --- | --- |
| **Genotype** | **DF** | | **PM** | | **HM** | | **Control DM** | **Maturity** |
| **Estimate** | **SE** | **Estimate** | **SE** | **Estimate** | **SE** |
| VR 708 | 60 | 0.428 | 85 | 0.468 | 92 | 0.537 | 102 | Early |
| INDAF 9 | 59.7 | 0.428 | 84.7 | 0.468 | 91.7 | 0.537 | 105 | Early |
| VR 847 | 62 | 0.428 | 87 | 0.468 | 94 | 0.537 | 119 | Medium |
| GPU 26 | 61 | 0.428 | 86 | 0.468 | 93 | 0.537 | 120 | Medium |
| GPU 28 | 61.3 | 0.428 | 86.3 | 0.468 | 93.3 | 0.537 | 125 | Medium |
| PR 1045 | 64.3 | 0.428 | 88.7 | 0.468 | 95.7 | 0.537 | 125 | Medium |
| VR 936 | 64.7 | 0.428 | 89.3 | 0.468 | 96.3 | 0.537 | 125 | Medium |
| GPU 67 | 63.3 | 0.428 | 88.3 | 0.468 | 95.3 | 0.537 | 128 | Late |
| PR 202 | 62.3 | 0.428 | 87.3 | 0.468 | 94.3 | 0.537 | 132 | Late |
| MR 6 | 63.7 | 0.428 | 88.3 | 0.468 | 95.3 | 0.537 | 136 | Late |
|  |  |  |  |  |  |  |  |  |
| **8 HOURS** | | | | | | | | |
| VR 708 | 54.7 | 0.428 | 76.7 | 0.468 | 81.7 | 0.537 | 102 | Early |
| INDAF 9 | 55.7 | 0.428 | 77.7 | 0.468 | 82.7 | 0.537 | 105 | Early |
| VR 847 | 55.7 | 0.428 | 77.7 | 0.468 | 84.3 | 0.537 | **119** | Medium |
| GPU 26 | 55 | 0.428 | 77 | 0.468 | 82 | 0.537 | 120 | Medium |
| GPU 28 | 54.3 | 0.428 | 76.3 | 0.468 | 82 | 0.537 | 125 | Medium |
| PR 1045 | 57 | 0.428 | 79 | 0.468 | 85.3 | 0.537 | 125 | Medium |
| VR 936 | 59 | 0.428 | 81.3 | 0.468 | 88.3 | 0.537 | 125 | Medium |
| GPU 67 | 58 | 0.428 | 80 | 0.468 | 87 | 0.537 | 128 | Late |
| PR 202 | 57 | 0.428 | 79 | 0.468 | 85.3 | 0.537 | 132 | Late |
| MR 6 | 59 | 0.428 | 81 | 0.468 | 88 | 0.537 | 136 | Late |
|  |  |  |  |  |  |  |  |  |
| **9 HOURS** | | | | | | | | |
| VR 708 | 54.7 | 0.428 | 75 | 0.468 | 82.3 | 0.537 | 102 | Early |
| INDAF 9 | 55.7 | 0.428 | 75.7 | 0.468 | 82.7 | 0.537 | 105 | Early |
| VR 847 | 56 | 0.428 | 76 | 0.468 | 85 | 0.537 | 119 | Medium |
| GPU 26 | 56.3 | 0.428 | 76.3 | 0.468 | 83.3 | 0.537 | 120 | Medium |
| GPU 28 | 57.3 | 0.428 | 77.3 | 0.468 | 84.3 | 0.537 | 125 | Medium |
| PR 1045 | 58.3 | 0.428 | 78.3 | 0.468 | 86.3 | 0.537 | 125 | Medium |
| VR 936 | 59 | 0.428 | 79.7 | 0.468 | 88.3 | 0.537 | 125 | Medium |
| GPU 67 | 58.7 | 0.428 | 78.7 | 0.468 | 86.7 | 0.537 | 128 | Late |
| PR 202 | 57.3 | 0.428 | 77.3 | 0.468 | 84.3 | 0.537 | 132 | Late |
| MR 6 | 58.7 | 0.428 | 78.7 | 0.468 | 87.3 | 0.537 | 136 | Late |
|  |  |  |  |  |  |  |  |  |
| **13 HOURS** | | | | | | | | |
| VR 708 | 67.3 | 0.428 | 97.7 | 0.468 | 105 | 0.537 | 102 | Early |
| INDAF 9 | 67.3 | 0.428 | 97.3 | 0.468 | 105.7 | 0.537 | 105 | Early |
| VR 847 | 69.7 | 0.428 | 98.7 | 0.468 | 107 | 0.537 | 119 | Medium |
| GPU 26 | 67.3 | 0.428 | 97.7 | 0.468 | 105.7 | 0.537 | 120 | Medium |
| GPU 28 | 68.7 | 0.428 | 98.3 | 0.468 | 106.3 | 0.537 | 125 | Medium |
| PR 1045 | 72 | 0.428 | 101.3 | 0.468 | 109 | 0.537 | 125 | Medium |
| VR 936 | 72 | 0.428 | 101.3 | 0.468 | 109 | 0.537 | 125 | Medium |
| GPU 67 | 70.7 | 0.428 | 100 | 0.468 | 108 | 0.537 | 128 | Late |
| PR 202 | 69.7 | 0.428 | 99 | 0.468 | 107 | 0.537 | 132 | Late |
| MR 6 | 71.3 | 0.428 | 100.7 | 0.468 | 108.7 | 0.537 | 136 | Late |

*DF: Days to fifty percent flowering; DM: Days to maturity; PM: Physiological maturity; HM: Harvestable maturity.
